# Supplementary material
Source: publisher site journal article supplement (https://www.spandidos-publications.com/957/downloadSupplementary)

Figure S1. Flow chart for the study design ideas and analysis process; primarily describing the analysis method and grouping basis in the present study. TCGA, The Cancer Genome Atlas; lncRNA, long non-coding RNA; miRNA, microRNA; PPI, protein-protein interaction.

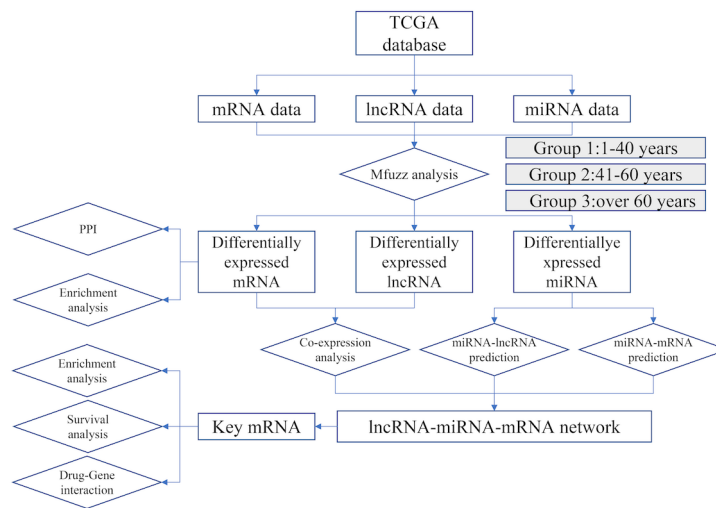

Supplement: Supplementary file 1 [file downloadSupplementary]
